# Supplementary material for: Methanol aromatization over Ga-doped desilicated HZSM-5
Source: Royal Society of Chemistry journal article supplement (doi:10.1039/c6ra16052b), 2016-01-01
Supplement: c6ra16052b1.pdf [file c6ra16052b1.pdf]

## Supporting Information

for

### Methanol aromatization over Ga-doped desilicated HZSM-5

**Po-Chen Lai<sup>a</sup>, Chao-Huang Chen<sup>b</sup>, His-Yen Hsu<sup>b</sup>, Chiou-Hwang Lee<sup>b</sup>, Yu-Chuan Lin<sup>a,\*</sup>**

<sup>a</sup>Department of Chemical Engineering, National Cheng Kung University, Tainan  
70101, Taiwan

<sup>b</sup>Division of Chemical Engineering, Material and Chemical Research Laboratories,  
Industrial Technology Research Institute, Hsinchu 30011, Taiwan

\*Corresponding author: [yclin768@mail.ncku.edu.tw](mailto:yclin768@mail.ncku.edu.tw)

## Contents

Table S1. Initial activity and product distribution of isobutane conversion over HZSM-5 and HDZSM-5.

Table S2. Initial activity and product distribution of isobutane conversion over Ga/HZSM-5 and Ga/HDZSM-5.

Table S1. Initial activity and product distribution of isobutane conversion over HZSM-5 and HDZSM-5.

| Temp. (°C)                            | HZSM-5 |      |      |      |      | HDZSM-5 |      |      |      |      |
|---------------------------------------|--------|------|------|------|------|---------|------|------|------|------|
|                                       | 400    | 425  | 450  | 475  | 500  | 400     | 425  | 450  | 475  | 500  |
| Conversion (%)                        | 1.8    | 3.8  | 9.0  | 18.4 | 34.4 | 0.8     | 1.9  | 4.4  | 10.3 | 24.0 |
| C <sub>1</sub>                        | 3.4    | 4.3  | 5.3  | 5.6  | 6.4  | 3.5     | 4.5  | 6.1  | 6.1  | 6.5  |
| C <sub>2</sub> <sup>=</sup>           | 24.7   | 24.3 | 31.0 | 33.2 | 33.0 | 27.5    | 19.8 | 24.6 | 25.2 | 26.9 |
| C <sub>3</sub> <sup>=</sup>           | 65.1   | 66.2 | 57.9 | 52.8 | 47.2 | 59.4    | 69.0 | 63.5 | 60.5 | 56.0 |
| C <sub>4</sub> <sup>=</sup>           | 5.0    | 4.0  | 3.2  | 3.1  | 3.4  | 7.1     | 5.3  | 4.4  | 5.1  | 4.5  |
| C <sub>5</sub> <sup>=</sup>           | 1.4    | 1.0  | 0.7  | 0.6  | 0.3  | 2.5     | 1.2  | 0.9  | 0.8  | 0.5  |
| C <sub>6</sub> <sup>=</sup>           | 0.0    | 0.0  | 0.2  | 0.1  | 0.0  | 0       | 0    | 0    | 0.1  | 0.1  |
| C <sub>5-7</sub>                      | 0.4    | 0.2  | 0    | 0.1  | 0.1  | 0       | 0.2  | 0.1  | 0.1  | 0.0  |
| B                                     | 0      | 0    | 0.2  | 0.8  | 2.2  | 0       | 0    | 0    | 0.4  | 1.2  |
| T                                     | 0      | 0    | 0.9  | 2.4  | 5.0  | 0       | 0    | 0.4  | 1.2  | 3.0  |
| o-X + m-X                             | 0      | 0    | 0.6  | 1.0  | 1.9  | 0       | 0    | 0    | 0.5  | 1.0  |
| p-X                                   | 0      | 0    | 0    | 0.3  | 0.5  | 0       | 0    | 0    | 0    | 0.3  |
| C <sub>9</sub> <sup>+</sup> aromatics | 0      | 0    | 0    | 0    | 0    | 0       | 0    | 0    | 0    | 0    |
| ∑ Aromatics                           | 0      | 0    | 1.7  | 4.5  | 9.7  | 0       | 0    | 0.4  | 2.0  | 5.6  |

Table S2. Initial activity and product distribution of isobutane conversion over Ga/HZSM-5 and Ga/HDZSM-5.

| Temp. (°C)                            | Ga/HZSM-5 |      |      |      |      | Ga/HDZSM-5 |      |      |      |      |
|---------------------------------------|-----------|------|------|------|------|------------|------|------|------|------|
|                                       | 400       | 425  | 450  | 475  | 500  | 400        | 425  | 450  | 475  | 500  |
| Conversion (%)                        | 17.7      | 30.6 | 44.6 | 58.3 | 75.6 | 15.0       | 32.6 | 53.1 | 69.0 | 80.0 |
| C <sub>1</sub>                        | 1.9       | 2.1  | 2.7  | 3.1  | 3.9  | 4.4        | 3.0  | 3.3  | 3.5  | 3.5  |
| C <sub>2</sub> <sup>=</sup>           | 16.3      | 15.0 | 15.0 | 15.9 | 18.2 | 19.9       | 15.6 | 15.0 | 15.6 | 17.4 |
| C <sub>3</sub> <sup>=</sup>           | 29.9      | 24.9 | 23.2 | 22.6 | 21.9 | 45.7       | 30.9 | 26.5 | 23.2 | 21.1 |
| C <sub>4</sub> <sup>=</sup>           | 4.7       | 5.1  | 4.9  | 5.3  | 3.9  | 4.9        | 5.3  | 4.8  | 4.1  | 3.7  |
| C <sub>5</sub> <sup>=</sup>           | 0.4       | 0.2  | 0.1  | 0    | 0    | 1.7        | 0.4  | 0.1  | 0.0  | 0.0  |
| C <sub>6</sub> <sup>=</sup>           | 0.1       | 0    | 0    | 0    | 0    | 0.2        | 0.2  | 0.0  | 0.0  | 0.0  |
| C <sub>5-7</sub>                      | 0.1       | 0    | 0    | 0    | 0    | 0.3        | 0.1  | 0.0  | 0.0  | 0.0  |
| B                                     | 5.2       | 7.8  | 10.9 | 13.2 | 17.2 | 3.3        | 7.3  | 11.0 | 13.7 | 14.0 |
| T                                     | 21.7      | 25.6 | 27.3 | 27.1 | 26.2 | 11.6       | 22.5 | 24.8 | 24.3 | 23.3 |
| o-X + m-X                             | 14.2      | 13.3 | 11.2 | 9.2  | 6.6  | 5.5        | 10.7 | 9.2  | 7.7  | 6.8  |
| p-X                                   | 3.4       | 3.5  | 3.0  | 2.4  | 1.4  | 1.4        | 2.5  | 2.2  | 1.8  | 1.3  |
| C <sub>9</sub> <sup>+</sup> atomatics | 2.1       | 2.5  | 1.7  | 1.2  | 0.7  | 1.1        | 1.5  | 3.1  | 6.1  | 8.9  |
| ∑ Aromatics                           | 46.7      | 52.7 | 54.1 | 53.1 | 52.1 | 22.9       | 44.5 | 50.2 | 53.6 | 54.3 |
